# Supplementary material for: Determination of twenty organophosphorus pesticides in blood serum by gas chromatography-tandem mass spectrometry
Source: Royal Society of Chemistry journal article supplement (doi:10.1039/c6ay00825a), 2016-01-01
Supplement: c6ay00825a1.pdf [file c6ay00825a1.pdf]

## Supplementary Information

### Determination of twenty organophosphorus pesticides in blood serum by gas chromatography-tandem mass spectrometry

Chunxin Chang,<sup>‡,a,b</sup> Jia Luo,<sup>‡,a,b</sup> Minjian Chen,<sup>a,b,c,\*</sup> Keqin Wu,<sup>a,b</sup> Tianyu Dong,<sup>a,b</sup> Xiaowei He,<sup>a,b</sup> Kun Zhou,<sup>a,b</sup> Li Wang,<sup>d</sup> Daozhen Chen,<sup>e</sup> Zuomin Zhou,<sup>e</sup> Xinru Wang,<sup>a,b,\*</sup> Yankai Xia<sup>a,b,\*</sup>

<sup>a</sup>State Key Laboratory of Reproductive Medicine, Institute of Toxicology, School of Public Health, Nanjing Medical University, Nanjing 211166, China

<sup>b</sup>Key Laboratory of Modern Toxicology of Ministry of Education, School of Public Health, Nanjing Medical University, Nanjing 211166, China

<sup>c</sup>Wuxi Maternal and Child Health Hospital Affiliated to Nanjing Medical University, Wuxi 214002, China

<sup>d</sup>Department of Hygiene Analysis and Detection, School of Public Health, Nanjing Medical University, Nanjing, Jiangsu 211166, P. R. China.

<sup>e</sup>State Key Laboratory of Reproductive Medicine, Nanjing Medical University, Nanjing 210029, China

<sup>‡</sup>These authors contributed equally to this work

\* To whom correspondence should be addressed:

Dr. Minjian Chen, Dr. Xinru Wang, and Dr. Yankai Xia.

State Key Laboratory of Reproductive Medicine, Institute of Toxicology, School of Public Health, Nanjing Medical University, No.101 Longmian Road, Nanjing 211166, China.

Phone: +86-25-86868427; Fax: +86-25-86868427; E-mail: [minjianchen@njmu.edu.cn](mailto:minjianchen@njmu.edu.cn),

[xrwang@njmu.edu.cn](mailto:xrwang@njmu.edu.cn), [yankaixia@njmu.edu.cn](mailto:yankaixia@njmu.edu.cn).

## Table of Contents

**Fig. S1** Responses of product ion under different collision energies (CEs).

**Fig. S2** Optimization process for the solid phase extraction.
